# Supplementary material for: Adaptations ofBacillus shacheensisHNA-14 required for long-term survival under osmotic challenge: a multi-omics perspective
Source: Royal Society of Chemistry journal article supplement (doi:10.1039/c8ra05472j), 2018-01-01
Supplement: c8ra05472j1.pdf [file c8ra05472j1.pdf]

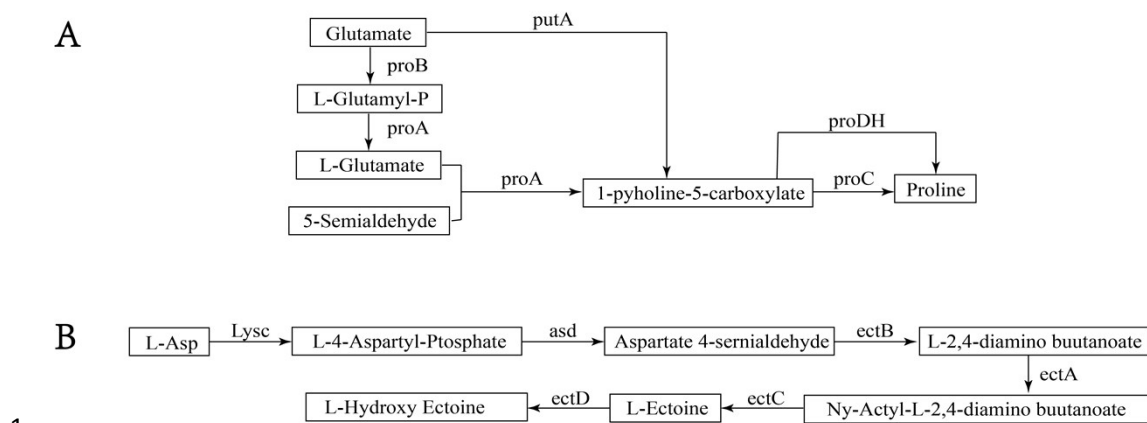

**Figure S1.** The synthetic pathway of proline (A) and ectoine(B).

1

2

4

5

**Table S1.** Genes related to osmotic regulation.

|                                | <b>Gene name</b> | <b>Annotation</b>                                                 |
|--------------------------------|------------------|-------------------------------------------------------------------|
| Kdp-type systems               | KdpD             | Osmosensitive K <sup>+</sup> channel histidine kinase KdpD        |
| Trk-type systems               | TrkA             | Trk system potassium uptake protein TrkA                          |
|                                | TrkB             | Trk system potassium uptake protein TrkB                          |
|                                | KTRD             | potassium uptake protein, integral membrane component, KtrD       |
| Kef-type systems               | VGSC             | K <sup>+</sup> transporter                                        |
|                                | KefA             | Potassium efflux system KefA protein                              |
| Na <sup>+</sup> efflux systems | ABC-2.P          | Na <sup>+</sup> efflux ABC transporter permease                   |
|                                | ABC-2.A          | Na <sup>+</sup> efflux ABC transporter ATP-binding protein        |
|                                | MnhA             | monovalent cation/H <sup>+</sup> antiporter subunit A             |
|                                | NhaC             | Na <sup>(+)</sup> /H <sup>(+)</sup> antiporter NhaC               |
| Glycine betaine                | ProW             | Glycine/betaine ABC transporter                                   |
|                                | OpuD             | Glycine betaine transporter                                       |
|                                | ProX             | Glycine betaine ABC transporter substrate-binding protein         |
|                                | OpuC             | Glycine/betaine ABC transporter substrate-binding protein         |
|                                | OpuA             | Proline/glycine betaine ABC transporter ATP-binding protein       |
|                                | ProV             | Glycine betaine ABC transporter ATP-binding protein               |
|                                | OpuD             | Glycine betaine transporter                                       |
|                                | TC.BCT           | Choline/glycine betaine transporter                               |
|                                | ProX             | Proline/glycine betaine ABC transporter substrate-binding protein |
|                                | OpuA             | Proline/glycine betaine ABC transporter ATP-binding protein       |
|                                | OpuC             | Proline/glycine betaine ABC transporter substrate-binding protein |
|                                | OpuBD            | Proline/glycine betaine ABC transporter permease                  |
|                                | GbsR             | Betaine operon transcriptional regulator                          |

---

|           |       |                                                           |
|-----------|-------|-----------------------------------------------------------|
|           | BetL  | Glycine betaine transporter                               |
|           | BetT  | High-affinity choline uptake protein                      |
| Trehalose | ScrA  | PTS system trehalose-specific transporter subunits IIBC   |
|           | TreR  | GntR family transcriptional repressor of trehalose operon |
|           | MalF  | Trehalose/maltose transport system permease protein MalF  |
|           | TreB  | PTS system, trehalose-specific IIB component              |
| Proline   | PutA  | 1-pyrroline-5-carboxylate dehydrogenase                   |
|           | ProA  | Gamma-glutamyl phosphate reductase                        |
|           | ProB  | Gamma-glutamyl kinase                                     |
|           | ProC  | Pyrroline-5-carboxylate reductase                         |
|           | ProDH | Proline dehydrogenase                                     |
| Ectoine   | LysC  | Aspartate kinase                                          |
|           | Asd   | Aspartate-semialdehyde dehydrogenase                      |
|           | EctA  | L-2,4-diaminobutyric acid acetyltransferase               |
|           | EctB  | Diaminobutyrate--2-oxoglutarate aminotransferase          |
|           | EctC  | L-ectoine synthase                                        |
|           | EctD  | Ectoine hydroxylase                                       |

---

8

9 **Table S2.** Changes in gene expression when cells cultured in minimal medium supplemented with  
 10 different salt concentration. A: 5% NaCl; B: 15% NaCl.

| <b>ID</b>                                                   | <b>Fold change<br/>(B/A)</b> | <b>Log<sub>2</sub> (fold<br/>change B/A)</b> | <b>Annotation</b>                                                              |
|-------------------------------------------------------------|------------------------------|----------------------------------------------|--------------------------------------------------------------------------------|
| <b>Energy metabolism and cell composition related genes</b> |                              |                                              |                                                                                |
| AVZ68_RS15870                                               | 1.354                        | 0.438                                        | Class D sortase                                                                |
| AVZ68_RS08620                                               | 1.396                        | 0.482                                        | ATP synthase subunit I                                                         |
| AVZ68_RS02695                                               | 1.362                        | 0.445                                        | Dehydrogenase                                                                  |
| AVZ68_RS12750                                               | 1.375                        | 0.459                                        | Dehydratase                                                                    |
| AVZ68_RS10070                                               | 1.376                        | 0.460                                        | Pyruvate dehydrogenase (Acetyl-<br>transferring) E1 component<br>subunit alpha |
| AVZ68_RS10205                                               | 1.414                        | 0.499                                        | Acetyltransferase                                                              |
| AVZ68_RS09995                                               | 1.421                        | 0.507                                        | Phenylacetate-CoA oxygenase                                                    |
| AVZ68_RS09310                                               | 1.349                        | 0.432                                        | Carboxyvinyl-<br>carboxyphosphonate<br>phosphorylmutase                        |
| AVZ68_RS10075                                               | 1.351                        | 0.434                                        | Alpha-ketoacid dehydrogenase<br>subunit beta                                   |
| AVZ68_RS13645                                               | 1.335                        | 0.417                                        | Tryptophan synthase subunit alpha                                              |
| AVZ68_RS13735                                               | 1.307                        | 0.386                                        | 4-hydroxy-tetrahydrodipicolinate<br>reductase                                  |
| AVZ68_RS07410                                               | 0.697                        | -0.521                                       | Dihydroxy-acid dehydratase                                                     |
| AVZ68_RS16190                                               | 1.339                        | 0.422                                        | Cystathionine gamma-synthase                                                   |
| AVZ68_RS05885                                               | 0.618                        | -0.694                                       | Cysteine synthase A                                                            |
| AVZ68_RS17040                                               | 1.311                        | 0.390                                        | Riboflavin synthase                                                            |
| AVZ68_RS17450                                               | 0.677                        | -0.562                                       | Homoserine dehydrogenase                                                       |
| AVZ68_RS04500                                               | 1.351                        | 0.434                                        | Imidazoleglycerol-phosphate<br>dehydratase                                     |

|                                               |       |        |                                                 |
|-----------------------------------------------|-------|--------|-------------------------------------------------|
| AVZ68_RS02555                                 | 1.327 | 0.408  | Oxidoreductase                                  |
| AVZ68_RS16190                                 | 1.339 | 0.422  | Cystathionine gamma-synthase                    |
| AVZ68_RS17220                                 | 0.663 | -0.593 | Diaminobutyrate acetyltransferase               |
| AVZ68_RS01095                                 | 1.313 | 0.393  | Shikimate dehydrogenase                         |
| AVZ68_RS12315                                 | 1.477 | 0.562  | 6-carboxy-5,6,7,8-tetrahydropterin synthase     |
| AVZ68_RS11800                                 | 1.489 | 0.574  | D-ribose pyranase                               |
| AVZ68_RS10010                                 | 1.490 | 0.575  | Ethyl tert-butyl ether degradation protein EthD |
| AVZ68_RS15940                                 | 1.343 | 0.425  | Succinyl-CoA--3-ketoacid-CoA transferase        |
| <b>Transcription regulation related genes</b> |       |        |                                                 |
| AVZ68_RS15265                                 | 0.552 | -0.857 | Translation elongation factor Tu                |
| AVZ68_RS14025                                 | 0.625 | -0.678 | Elongation factor Ts                            |
| AVZ68_RS15260                                 | 0.573 | -0.803 | Elongation factor G                             |
| AVZ68_RS08040                                 | 0.649 | -0.623 | Transcriptional regulator Spx                   |
| <b>Transport system related genes</b>         |       |        |                                                 |
| AVZ68_RS14670                                 | 0.577 | -0.794 | ABC transporter permease                        |
| AVZ68_RS09530                                 | 1.365 | 0.449  | ABC transporter permease                        |
| AVZ68_RS19130                                 | 1.439 | 0.524  | PTS mannitol transporter subunit IIA            |
| AVZ68_RS19125                                 | 1.444 | 0.529  | PTS ascorbate transporter subunit IIB           |
| AVZ68_RS09555                                 | 1.376 | 0.460  | ABC transporter substrate-binding protein       |
| AVZ68_RS09560                                 | 1.359 | 0.443  | Sugar ABC transporter permease                  |
| <b>Central carbon metabolic pathways</b>      |       |        |                                                 |
| <b>Glycolysis pathway</b>                     |       |        |                                                 |
| AVZ68_RS06075                                 | 1.102 | 0.139  | PTS glucose transporter subunit                 |

|               |       |         | IIA                                                            |
|---------------|-------|---------|----------------------------------------------------------------|
| AVZ68_RS06265 | 1.005 | 0.007   | Glucose-6-phosphate isomerase                                  |
| AVZ68_RS08755 | 0.986 | -0.0193 | Fructose-1,6-bisphosphate<br>aldolase, class II                |
| AVZ68_RS04405 | 0.966 | -0.049  | Triose-phosphate isomerase                                     |
| AVZ68_RS07125 | 1.031 | 0.044   | Glyceraldehyde-3-phosphate<br>dehydrogenase                    |
| AVZ68_RS04410 | 1.001 | 0.001   | Phosphoglycerate kinase                                        |
| AVZ68_RS04400 | 1.118 | 0.161   | Phosphoglycerate mutase 2,3-<br>diphosphoglycerate-independent |
| AVZ68_RS04395 | 1.018 | 0.026   | Phosphopyruvate hydratase                                      |
| AVZ68_RS07065 | 0.873 | -0.195  | Pyruvate kinase                                                |
| TCA cycle     |       |         |                                                                |
| AVZ68_RS07080 | 0.821 | -0.284  | Citrate synthase                                               |
| AVZ68_RS05050 | 0.919 | -0.121  | Aconitate hydratase 1                                          |
| AVZ68_RS07085 | 0.969 | -0.045  | Isocitrate dehydrogenase<br>(NADP(+))                          |
| AVZ68_RS12235 | 0.902 | -0.149  | 2-oxoglutarate dehydrogenase E1<br>component                   |
| AVZ68_RS12230 | 0.940 | -0.089  | Dihydrolipoamide<br>succinyltransferase                        |
| AVZ68_RS11090 | 0.868 | -0.204  | Succinate--CoA ligase subunit<br>beta                          |
| AVZ68_RS11085 | 0.888 | -0.171  | Succinate--CoA ligase subunit<br>alpha                         |
| AVZ68_RS07320 | 0.909 | -0.137  | Succinate dehydrogenase<br>flavoprotein subunit                |
| AVZ68_RS07325 | 0.921 | -0.119  | Succinate dehydrogenase iron-<br>sulfur subunit                |

|                                  |       |        |                                              |
|----------------------------------|-------|--------|----------------------------------------------|
| AVZ68_RS07315                    | 0.929 | -0.107 | Succinate dehydrogenase                      |
| AVZ68_RS12160                    | 1.049 | 0.070  | Fumarate hydratase                           |
| AVZ68_RS12155                    | 0.912 | -0.133 | Fumarate hydratase                           |
| AVZ68_RS07090                    | 0.928 | -0.108 | Malate dehydrogenase                         |
| <b>Pentose phosphate pathway</b> |       |        |                                              |
| AVZ68_RS17575                    | 0.880 | -0.184 | Glucose-6-phosphate dehydrogenase            |
| AVZ68_RS17370                    | 1.056 | 0.079  | Ferredoxin--NADP(+) reductase                |
| AVZ68_RS02745                    | 1.085 | 0.118  | Ribose 5-phosphate isomerase A               |
| AVZ68_RS14625                    | 0.910 | -0.135 | Ribose-phosphate pyrophosphokinase           |
| AVZ68_RS11290                    | 0.844 | -0.245 | Ribulose-phosphate 3-epimerase               |
| AVZ68_RS05020                    | 0.882 | -0.181 | Transketolase                                |
| AVZ68_RS08750                    | 0.891 | -0.166 | Transaldolase                                |
| AVZ68_RS08755                    | 0.986 | -0.019 | Fructose-1,6-bisphosphate aldolase, class II |
| <b>Proline synthesis pathway</b> |       |        |                                              |
| AVZ68_RS06000                    | 1.199 | 0.262  | Glutamate 5-kinase                           |
| AVZ68_RS05995                    | 1.156 | 0.209  | Pyrroline-5-carboxylate reductase            |
| AVZ68_RS10650                    | 1.072 | 0.101  | Pyrroline-5-carboxylate reductase            |
| AVZ68_RS10170                    | 1.053 | 0.074  | L-glutamate gamma-semialdehyde dehydrogenase |
| AVZ68_RS10160                    | 0.877 | -0.189 | Proline dehydrogenase                        |
| <b>Ribosomal proteins</b>        |       |        |                                              |
| AVZ68_RS07680                    | 0.434 | -1.203 | 50S ribosomal protein L21                    |
| AVZ68_RS15270                    | 0.489 | -1.031 | 30S ribosomal protein S10                    |
| AVZ68_RS06885                    | 0.548 | -0.867 | 30S ribosomal protein S4                     |
| AVZ68_RS14020                    | 0.494 | -1.016 | 30S ribosomal protein S2                     |
| AVZ68_RS07690                    | 0.564 | -0.827 | 50S ribosomal protein L27                    |

---

|               |       |        |                                               |
|---------------|-------|--------|-----------------------------------------------|
| AVZ68_RS15245 | 0.574 | -0.801 | 50S ribosomal protein L7ae-like protein       |
| AVZ68_RS15300 | 0.579 | -0.786 | 50S ribosomal protein L22                     |
| AVZ68_RS15310 | 0.584 | -0.776 | 50S ribosomal protein L16                     |
| AVZ68_RS15255 | 0.589 | -0.764 | 30S ribosomal protein S7                      |
| AVZ68_RS15305 | 0.599 | -0.739 | 30S ribosomal protein S3                      |
| AVZ68_RS15440 | 0.626 | -0.675 | 50S ribosomal protein L13                     |
| AVZ68_RS15210 | 0.641 | -0.641 | 50S ribosomal protein L11                     |
| AVZ68_RS11280 | 0.646 | -0.629 | 50S ribosomal protein L28                     |
| AVZ68_RS11160 | 0.653 | -0.616 | 50S ribosomal protein L19                     |
| AVZ68_RS13470 | 0.657 | -0.606 | 30S ribosomal protein S6                      |
| AVZ68_RS00955 | 0.663 | -0.593 | 30S ribosomal protein S21                     |
| AVZ68_RS15215 | 0.669 | -0.578 | 50S ribosomal protein L1                      |
| AVZ68_RS15355 | 0.681 | -0.554 | 50S ribosomal protein L18                     |
| AVZ68_RS14085 | 0.689 | -0.538 | 50S ribosomal protein L7                      |
| AVZ68_RS15315 | 2.812 | 1.492  | 50S ribosomal protein L29                     |
| AVZ68_RS15080 | 1.396 | 0.481  | Ribosomal-protein-alanine N-acetyltransferase |

---

**Hypothetical proteins**

---

|               |       |        |                      |
|---------------|-------|--------|----------------------|
| AVZ68_RS19570 | 0.376 | -1.412 | Hypothetical protein |
| AVZ68_RS07685 | 0.557 | -0.844 | Hypothetical protein |
| AVZ68_RS17715 | 0.573 | -0.803 | Hypothetical protein |
| AVZ68_RS03505 | 0.587 | -0.768 | Hypothetical protein |
| AVZ68_RS03920 | 0.596 | -0.748 | Hypothetical protein |
| AVZ68_RS01975 | 0.666 | -0.587 | Hypothetical protein |
| AVZ68_RS17440 | 0.670 | -0.577 | Homoserine kinase    |
| AVZ68_RS12915 | 0.673 | -0.571 | Hypothetical protein |
| AVZ68_RS13995 | 0.678 | -0.561 | Hypothetical protein |
| AVZ68_RS12345 | 0.697 | -0.519 | Hypothetical protein |

---



---

|               |       |       |                      |
|---------------|-------|-------|----------------------|
| AVZ68_RS10825 | 1.304 | 0.383 | Hypothetical protein |
| AVZ68_RS19190 | 1.307 | 0.386 | Hypothetical protein |
| AVZ68_RS08320 | 1.314 | 0.394 | Hypothetical protein |
| AVZ68_RS06550 | 1.319 | 0.399 | Hypothetical protein |
| AVZ68_RS16015 | 1.319 | 0.401 | Hypothetical protein |
| AVZ68_RS10395 | 1.325 | 0.406 | Hypothetical protein |
| AVZ68_RS13350 | 1.336 | 0.418 | Hypothetical protein |
| AVZ68_RS14995 | 1.342 | 0.425 | Hypothetical protein |
| AVZ68_RS06740 | 1.348 | 0.431 | Hypothetical protein |
| AVZ68_RS09365 | 1.379 | 0.464 | Hypothetical protein |
| AVZ68_RS08245 | 1.379 | 0.464 | Hypothetical protein |
| AVZ68_RS02490 | 1.398 | 0.483 | Hypothetical protein |
| AVZ68_RS00025 | 1.401 | 0.487 | Hypothetical protein |
| AVZ68_RS07135 | 1.410 | 0.496 | Hypothetical protein |
| AVZ68_RS11095 | 1.414 | 0.499 | Hypothetical protein |
| AVZ68_RS08025 | 1.429 | 0.516 | Hypothetical protein |
| AVZ68_RS04385 | 1.447 | 0.533 | Hypothetical protein |
| AVZ68_RS13795 | 1.455 | 0.541 | Hypothetical protein |
| AVZ68_RS07970 | 1.465 | 0.551 | Hypothetical protein |
| AVZ68_RS19825 | 1.471 | 0.556 | Hypothetical protein |
| AVZ68_RS07815 | 1.477 | 0.562 | Hypothetical protein |
| AVZ68_RS13895 | 1.571 | 0.652 | Hypothetical protein |
| AVZ68_RS19810 | 1.594 | 0.673 | Hypothetical protein |
| AVZ68_RS18560 | 1.616 | 0.693 | Hypothetical protein |
| AVZ68_RS17485 | 1.634 | 0.708 | Hypothetical protein |
| AVZ68_RS04635 | 1.638 | 0.712 | Hypothetical protein |
| AVZ68_RS01115 | 1.648 | 0.721 | Hypothetical protein |
| AVZ68_RS05210 | 1.711 | 0.775 | Hypothetical protein |
| AVZ68_RS04055 | 1.847 | 0.885 | YqzE family protein  |

---

---

|               |       |        |                      |
|---------------|-------|--------|----------------------|
| AVZ68_RS06905 | 1.886 | 0.915  | Hypothetical protein |
| AVZ68_RS19605 | 2.308 | 1.207  | Hypothetical protein |
| AVZ68_RS04875 | 2.384 | 1.253  | Hypothetical protein |
| AVZ68_RS16610 | 1.357 | 0.441  | Hypothetical protein |
| AVZ68_RS16010 | 1.359 | 0.443  | Hypothetical protein |
| AVZ68_RS19110 | 1.376 | 0.460  | Hypothetical protein |
| AVZ68_RS07965 | 1.503 | 0.588  | Hypothetical protein |
| AVZ68_RS10570 | 1.483 | 0.568  | Hypothetical protein |
| AVZ68_RS04065 | 0.685 | -0.546 | Hypothetical protein |

---

11

13

14 **Table S3.** Significant metabolic differences when cells were cultured in TSB medium

15 supplemented with different salt concentration. A: metabolic cultured with 5% NaCl; B: metabolic

16 cultured with 10% NaCl; C: metabolic cultured with 15% NaCl.

| <b>Name</b>                        | <b>molecular weight</b> | <b>Log<sub>2</sub>(fold change B/A)</b> | <b>Log<sub>2</sub>(fold change C/A)</b> | <b>Log<sub>2</sub>(fold change C/B)</b> |
|------------------------------------|-------------------------|-----------------------------------------|-----------------------------------------|-----------------------------------------|
| <b>Amino acids and derivatives</b> |                         |                                         |                                         |                                         |
| L-Proline                          | 115.0631                | -1.803                                  | -2.698                                  | -0.717                                  |
| L-Valine                           | 117.0784                | -1.719                                  | -1.301                                  | 0.505                                   |
| Pyroglutamic acid                  | 129.0424                | -0.687                                  | -2.613                                  | -1.925                                  |
| L-Pyrrolysine                      | 255.1578                | 2.484                                   | 1.040                                   | -1.444                                  |
| L-Leucine                          | 131.0942                | -1.932                                  | -3.564                                  | -1.632                                  |
| L-Tyrosine                         | 181.0736                | -2.610                                  | -3.301                                  | -0.691                                  |
| L-Tryptophan                       | 204.0894                | -1.865                                  | -2.216                                  | -0.351                                  |
| Nitrotyrosine                      | 226.0572                | 3.145                                   | 1.825                                   | -1.321                                  |
| L-Pyrrolysine                      | 255.1578                | 2.484                                   | 1.040                                   | -1.444                                  |
| L-Glutamate                        | 147.0526                | -0.052                                  | -2.189                                  | -2.059                                  |
| Cinnamic acid                      | 148.0572                | 1.401                                   | -1.672                                  | -3.072                                  |
| L-Histidine                        | 155.0692                | -1.721                                  | -4.556                                  | -2.836                                  |
| Hydroxylysine                      | 162.1001                | -1.920                                  | -4.194                                  | -2.274                                  |
| Citrulline                         | 175.0964                | 3.877                                   | 0.137                                   | -3.739                                  |
| Ornithine                          | 132.0976                | -1.951                                  | -3.707                                  | -1.756                                  |
| N <sup>2</sup> -Acetyl-L-ornithine | 174.1001                | -2.074                                  | -3.474                                  | -1.401                                  |
| N <sup>α</sup> -Acetyl-L-glutamine | 188.0794                | -5.802                                  | -6.081                                  | -0.279                                  |
| <b>Fatty acids and derivatives</b> |                         |                                         |                                         |                                         |
| Stearamide                         | 283.2869                | -1.648                                  | -0.576                                  | 1.072                                   |
| Palmitic amide                     | 255.2556                | -1.332                                  | -2.548                                  | -0.522                                  |
| Oleamide                           | 281.2713                | -1.959                                  | -1.312                                  | 0.647                                   |
| Octadecanedioic acid               | 314.2464                | -0.385                                  | 0.072                                   | 0.458                                   |
| Sphinganine                        | 301.2972                | -2.011                                  | -2.745                                  | -0.734                                  |

|                                            |          |        |        |          |
|--------------------------------------------|----------|--------|--------|----------|
| MG(0:0/15:0/0:0)                           | 316.2623 | -0.141 | 0.388  | 0.530    |
| PIP(18:1(9Z)/18:1(11Z))                    | 942.5168 | -1.474 | 0.683  | 2.157    |
| PIP(20:3(5Z,8Z,11Z)/16:0)                  | 940.5033 | 2.082  | 3.347  | 1.265    |
| LysoPE(0:0/18:1(11Z))                      | 479.3022 | -4.205 | -1.414 | 2.792    |
| LysoPE(0:0/15:0)                           | 439.2687 | -2.094 | -1.039 | 1.055    |
| LysoPE(0:0/16:0)                           | 453.2846 | -6.276 | -2.809 | 3.467    |
| LysoPE(0:0/16:1(9Z))                       | 451.2704 | 1.834  | 2.020  | 0.186    |
| <b>Nucleotide and derivatives</b>          |          |        |        |          |
| Guanosine                                  | 283.1315 | -4.705 | -5.194 | -0.489   |
| Thymine                                    | 126.0428 | -0.453 | -2.051 | -1.598   |
| Hypoxanthine                               | 136.0392 | 1.146  | -2.696 | -3.842   |
| Inosine                                    | 268.0815 | 1.203  | 0.283  | -0.920   |
| Riboflavin                                 | 376.1374 | 1.080  | -1.130 | -2.210   |
| Dihydrouracil                              | 114.0435 | 2.952  | -0.634 | -3.586   |
| deoxyguanosine 5'-<br>monophosphate (dGMP) | 347.0623 | 1.221  | -0.984 | -2.205   |
| Glycitin                                   | 446.1219 | -3.112 | -1.224 | 1.888    |
| Flavine mononucleotide<br>(FMN)            | 456.1051 | 3.745  | 0.142  | -3.603   |
| Flavin adenine<br>dinucleotide (FAD)       | 785.1571 | 2.856  | -0.385 | -3.242   |
| <b>Organic acid</b>                        |          |        |        |          |
| Glucosaminic acid                          | 195.0753 | -0.442 | -0.712 | -0.27043 |
| Succinic acid                              | 118.0749 | 2.087  | -2.032 | -3.586   |
| Gluconic acid                              | 196.0586 | 1.872  | 0.956  | -0.916   |
| Malic acid                                 | 134.0221 | -1.112 | -4.824 | -3.712   |
| Phosphohydroxypyruvic<br>acid              | 183.9778 | -1.155 | -0.732 | 0.423    |
| Pantothenic Acid                           | 219.1103 | 0.211  | -4.294 | -4.506   |

|                                     |          |        |        |        |
|-------------------------------------|----------|--------|--------|--------|
| Phenylpyruvic acid                  | 164.0479 | 0.287  | -4.601 | -4.888 |
| D(-)- $\beta$ -hydroxy butyric acid | 104.0479 | -0.035 | -2.741 | -2.706 |
| L-2,4-diaminobutyric acid           | 118.0779 | -1.103 | -0.632 | 0.471  |
| Glycocholic Acid                    | 463.2074 | -4.226 | -6.168 | -1.943 |
| 12-Ketodeoxycholic acid             | 390.0595 | 3.094  | -1.674 | -4.779 |
| Taurochenodeoxycholic acid          | 499.3015 | -4.489 | -8.586 | -4.097 |
| N-Acetylmuramic acid                | 293.1118 | 0.992  | -6.405 | -7.397 |
| <b>Others</b>                       |          |        |        |        |
| D-Sorbitol                          | 182.0706 | -1.138 | -0.622 | 0.516  |
| Ectoine                             | 142.0736 | 0.667  | 0.338  | -0.321 |
| Acetylcholine                       | 145.1096 | -2.962 | -1.154 | 1.809  |
| Pyridoxamine                        | 168.0896 | -3.160 | -3.701 | -0.540 |
| Tyramine                            | 137.0838 | -3.434 | -2.491 | 0.943  |
| Lactaldehyde                        | 74.0372  | 0.714  | -3.067 | -3.781 |
| Hydrouracil                         | 128.0582 | 1.235  | -1.021 | -2.256 |
| Phenylacetaldehyde                  | 120.057  | -1.095 | -0.516 | 0.578  |
| Glycitein                           | 284.0674 | -3.034 | -1.270 | 1.764  |
| Spermidine                          | 145.1576 | 0.515  | 1.854  | 1.339  |

19

20 **Table S4.** Significant metabolic differences when cells were cultured in minimal medium

21 supplemented with different salt concentration. D: metabolic cultured with 5% NaCl; E: metabolic

22 cultured with 10% NaCl; F: metabolic cultured with 15% NaCl.

| Name                               | molecular weight | Log <sub>2</sub> (fold change E/D) | Log <sub>2</sub> (fold change F/D) | Log <sub>2</sub> (fold change F/E) |
|------------------------------------|------------------|------------------------------------|------------------------------------|------------------------------------|
| <b>Amino acids and derivatives</b> |                  |                                    |                                    |                                    |
| L-Proline                          | 115.0631         | 0.543                              | 1.509                              | 1.011                              |
| L-Valine                           | 117.0784         | 0.042                              | 0.298                              | 0.256                              |
| Pyroglutamic acid                  | 129.0424         | 0.136                              | 0.204                              | 0.068                              |
| L-Pyrrolysine                      | 255.1578         | 1.301                              | 1.493                              | 0.192                              |
| L-Leucine                          | 131.0952         | 0.124                              | 0.298                              | 0.177                              |
| L-Aspartic Acid                    | 133.0382         | 0.497                              | 0.533                              | 0.036                              |
| L-Tyrosine                         | 181.0745         | 0.750                              | 1.040                              | 0.290                              |
| L-Tryptophan                       | 204.0906         | 0.241                              | 0.304                              | 0.063                              |
| Nitrotyrosine                      | 226.0572         | 0.814                              | 0.957                              | 0.1423                             |
| L-Pyrrolysine                      | 255.1586         | 1.674                              | 2.14                               | 0.466                              |
| L-Glutamate                        | 147.0538         | -0.365                             | -0.739                             | -0.375                             |
| Cinnamic acid                      | 148.0572         | -0.397                             | -0.785                             | -0.388                             |
| L-Histidine                        | 155.0703         | -0.437                             | -0.786                             | -0.348                             |
| Hydroxylysine                      | 162.1009         | -1.004                             | -1.641                             | -0.637                             |
| Citrulline                         | 175.0964         | -0.136                             | -0.809                             | -0.674                             |
| Ornithine                          | 132.0906         | 0.198                              | -0.287                             | -0.485                             |
| N <sup>2</sup> -Acetyl-L-ornithine | 174.1001         | 0.974                              | 0.692                              | -0.282                             |
| N $\alpha$ -Acetyl-L-glutamine     | 188.0794         | 0.123                              | 0.372                              | 0.249                              |
| <b>Fatty acids and derivatives</b> |                  |                                    |                                    |                                    |
| Stearamide                         | 283.2869         | 0.262                              | 1.235                              | 0.918                              |
| Palmitic amide                     | 255.2558         | 0.168                              | 0.490                              | 0.322                              |
| Oleamide                           | 281.2713         | 0.557                              | 1.526                              | 0.969                              |
| Octadecanedioic acid               | 314.2464         | 0.515                              | 1.747                              | 1.430                              |

|                                              |          |        |        |        |
|----------------------------------------------|----------|--------|--------|--------|
| Sphinganine                                  | 301.2972 | 0.282  | 0.550  | 0.268  |
| MG(0:0/15:0/0:0)                             | 316.2623 | -0.32  | -0.184 | 0.136  |
| PIP(18:1(9Z)/18:1(11Z))                      | 942.5168 | 0.889  | 2.405  | 1.516  |
| PIP(20:3(5Z,8Z,11Z)/16:0)                    | 940.5033 | 0.935  | 1.797  | 0.862  |
| LysoPE(0:0/18:1(11Z))                        | 479.3022 | 0.517  | 1.588  | 0.386  |
| LysoPE(0:0/14:0)                             | 425.2548 | -0.186 | -1.228 | -1.043 |
| LysoPE(0:0/15:0)                             | 439.2707 | -0.401 | -1.047 | -0.734 |
| LysoPE(0:0/16:0)                             | 453.2863 | -0.488 | -1.202 | -0.955 |
| LysoPE(0:0/16:1(9Z))                         | 451.2704 | -2.013 | -3.426 | -1.412 |
| LysoPE(0:0/22:6(4Z,7Z,10Z,<br>,13Z,16Z,19Z)) | 525.2866 | -1.217 | -3.468 | -2.251 |
| <b>Nucleotide and derivatives</b>            |          |        |        |        |
| Guanosine                                    | 283.1315 | 0.034  | 0.136  | 0.102  |
| Thymine                                      | 126.0434 | 0.036  | -0.346 | -0.383 |
| Xanthosine                                   | 284.0764 | -0.892 | -2.419 | -1.526 |
| XMP                                          | 364.0428 | -1.328 | -4.184 | -2.856 |
| Hypoxanthine                                 | 136.0392 | -0.099 | -0.340 | -0.241 |
| Inosine                                      | 268.0815 | -0.746 | -0.934 | -0.188 |
| Riboflavin                                   | 376.1388 | -0.305 | -0.996 | -0.691 |
| Dihydrouracil                                | 114.0435 | -1.191 | -2.581 | -1.39  |
| deoxyguanosine 5'-<br>monophosphate (dGMP)   | 347.0639 | 0.444  | 0.272  | -0.172 |
| Glycitin                                     | 446.1219 | 0.522  | 0.750  | 0.557  |
| Flavine mononucleotide<br>(FMN)              | 456.1051 | -0.151 | -0.251 | -0.099 |
| Flavin adenine<br>dinucleotide (FAD)         | 785.1571 | -0.737 | -0.894 | -0.157 |
| <b>Organic acid</b>                          |          |        |        |        |
| Glucosaminic acid                            | 195.0753 | 0.221  | 1.342  | 1.121  |

|                                     |          |        |        |        |
|-------------------------------------|----------|--------|--------|--------|
| Succinic acid                       | 118.027  | 0.008  | -0.49  | -0.497 |
| Gluconic acid                       | 196.0586 | 0.698  | -0.781 | -1.479 |
| Malic acid                          | 134.0221 | 1.016  | 1.689  | 0.673  |
| Phosphohydroxypyruvic acid          | 183.9778 | -0.166 | -0.181 | -0.015 |
| Pantothenic Acid                    | 219.1103 | -1.276 | -2.258 | -0.983 |
| Phenylpyruvic acid                  | 164.048  | -0.354 | -0.533 | -0.179 |
| Dehydroascorbic acid                | 174.0171 | 0.898  | 1.647  | 0.748  |
| D(-)- $\beta$ -hydroxy butyric acid | 104.0479 | -1.267 | -1.163 | 0.104  |
| L-2,4-diaminobutyric acid           | 118.0749 | 0.286  | 0.303  | 0.018  |
| Cholic acid                         | 408.2883 | 0.378  | 0.188  | -0.191 |
| Glycocholic Acid                    | 463.2074 | -0.132 | 0.402  | 0.534  |
| 12-Ketodeoxycholic acid             | 390.0595 | 1.094  | 1.651  | 1.43   |
| Taurochenodeoxycholic acid          | 499.3015 | 0.775  | -0.220 | -0.995 |
| Glycodeoxycholate                   | 449.3146 | 0.712  | 1.099  | 0.229  |
| N-Acetylmuramic acid                | 293.1118 | 4.244  | 2.008  | -2.237 |
| <b>Others</b>                       |          |        |        |        |
| D-Sorbitol                          | 182.0796 | 0.411  | -1.567 | -1.978 |
| Ectoine                             | 142.0736 | 0.378  | 0.932  | -0.361 |
| Pyridoxamine                        | 168.0896 | -0.133 | -0.156 | -0.023 |
| Tyramine                            | 137.0838 | -0.338 | -0.179 | 0.159  |
| Lactaldehyde                        | 74.0372  | 0.034  | -0.396 | -0.431 |
| Hydrouracil                         | 128.0582 | 0.098  | 0.379  | 0.282  |
| Phenylacetaldehyde                  | 120.057  | 0.567  | 0.638  | 0.159  |
| Niacin                              | 122.0323 | 0.236  | 0.672  | 0.436  |
| Glycitein                           | 284.0674 | 0.495  | 1.144  | 0.648  |
| Tautomycin                          | 766.4503 | 1.167  | 2.295  | 1.071  |



---

|              |          |       |        |        |
|--------------|----------|-------|--------|--------|
| D-Pantethine | 554.245  | 0.059 | -1.633 | -1.692 |
| Spermidine   | 145.1576 | 1.163 | 1.871  | 0.709  |

---

23
